# Supplementary material for: Electronic structural dependence of the photophysical properties of fluorescent heteroditopic ligands – implications in designing molecular fluorescent indicators
Source: Royal Society of Chemistry journal article supplement (doi:10.1039/c0ob00482k), 2010-01-01
Supplement: c0ob00482k.pdf [file c0ob00482k.pdf]

# **Electronic Structural Dependence of the Photophysical Properties of Fluorescent Heteroditopic Ligands – Implications in Designing Molecular Fluorescent Indicators**

Ali H. Younes,<sup>a</sup> Lu Zhang,<sup>a</sup> Ronald J. Clark,<sup>a</sup> Michael W. Davidson,<sup>b,\*</sup> and Lei Zhu<sup>a,\*</sup>

<sup>a</sup> Department of Chemistry and Biochemistry, Florida State University, Tallahassee, FL 32306-4390, USA. Fax: +1 850 644 8281; Tel: +1 850 645 6813; E-mail: [lzhu@chem.fsu.edu](mailto:lzhu@chem.fsu.edu)

<sup>b</sup> National High Magnetic Field Laboratory and Department of Biological Science, Florida State University, 1800 East Paul Dirac Drive, Tallahassee, FL 32310, USA. Fax: +1 850 64 -8920; Tel: +1 850 644 0542; E-mail: [davidson@magnet.fsu.edu](mailto:davidson@magnet.fsu.edu)

## **Supporting Information**

## **Experimental Procedures:**

### **(1) CYCLIC VOLTAMMETRIC STUDIES**

The cyclic voltammograms (Figures S1-S4) were acquired in CH<sub>3</sub>CN (spectroscopic grade) containing Bu<sub>4</sub>NPF<sub>6</sub> (0.1 M) as supporting electrolyte using a CHI600C Electrochemical Analyzer. The data were collected at a concentration of ~0.5 mM of a substrate in a single compartment cell with a glassy carbon working electrode, a Pt wire counter electrode, and an Ag/AgCl reference electrode. The cyclic voltammograms at scan rate of 100 mV/s are reported.

### **(2) COMPUTATIONAL ANALYSIS**

The calculations were performed using the Gaussian 03 package of programs at a hybrid density functional theory (DFT) level. The function used to perform the optimizations and computations was the restricted B3LYP/6-31+G (d,p) where the optimized structures were chosen as the stationary points. (Frisch, M. J. et al. Gaussian 03, Revision C.02; Gaussian, Inc. Wallingford CT, 2004).

### **(3) ABSORPTION AND FLUORESCENCE TITRATION STUDIES**

Representative Procedure. The absorption and fluorescence data were collected on a Cary 100 Spectrophotometer and a Cary Eclipse Fluorometer, respectively. An CH<sub>3</sub>CN solution of **4** (5.0 μM) and ZnCl<sub>2</sub> (64 μM) was titrated into a semi-micro quartz spectrophotometer or fluorometer cuvette (Starna®) containing an CH<sub>3</sub>CN solution of **4** (750 μL, 5.0 μM) at rt. In the fluorescence titration experiment, the sample was excited at 336 nm (excitation slit = 1.5 nm; emission slit = 10 nm, PMT = 500 V). ZnCl<sub>2</sub> was chosen as the Zn<sup>2+</sup> source in titration experiments conducted in CH<sub>3</sub>CN because of the simple binding stoichiometry of 1:1 between ZnCl<sub>2</sub> and the bipy moiety. Zn(ClO<sub>4</sub>)<sub>2</sub> was chosen under aqueous buffering conditions due to its better solubility.

#### (4) LIFETIME MEASUREMENTS

The fluorescence lifetimes were measured using the time-correlated single photon counting (TCSPC) technique. **3** and **2a** were excited using a 295 nm LED while **4** and **2b** were excited using 370 nm LED with both LEDs operating at a repetition rate of 1 MHz. The emission decay was observed at emission  $\lambda_{\text{max}}$  of respective sample and data were recorded with a band spectral width of 10 nm and 10,000 counts in the peak channel. The timescale of the experiment was 100 ns (115.3 ps/channel). The emission decay data were then analyzed using the DAS6 software. The quality of the exponential fits was judged by both the randomness of the residue distribution, and the  $\chi^2$  obtained for different measurements (general acceptable range:  $\chi^2 < 1.3$ ). Two example decay traces are shown in Figures S14-S15).

#### (5) FLUORESCENCE QUANTUM YIELD MEASUREMENTS

The absorption spectrum of a substrate was collected first. The excitation wavelength ( $\lambda_{\text{ex}}$ ) of the substrate was chosen such that (1) the absorbance value at  $\lambda_{\text{ex}} < 0.1$ , and (2) the complete emission spectrum could be collected. Argon gas was bubbled through the sample before the emission spectrum was collected to remove oxygen. The absorbance value at  $\lambda_{\text{ex}}$  and integrated emission intensity of the substrate as well as those of a standard sample (quinine bisulfate in 0.05 M sulfuric acid) with known  $\phi_f$  (0.55) were used in Eq. 1 to calculate the  $\phi_f$  of the substrate,

$$\phi_f = [(A_s F_f n^2)/(A_f F_s n_0^2)] \phi_s \quad \text{Equation 1}$$

where  $A_s$  and  $A_f$  are the absorbance of the reference and sample solutions at their respective excitation wavelengths,  $F_f$  and  $F_s$  are the corresponding integrated fluorescence intensity, and  $n$  is the refractive index of the solvent of the sample ( $n$ ) or of the standard ( $n_0$ ).

For determining the  $\phi_f$  of the  $\text{Zn}^{2+}$  complex of a substrate, the concentrations of the substrate and  $\text{Zn}^{2+}$  in the sample were selected based on the fluorescence titration isotherm so that full saturation of the substrate by  $\text{ZnCl}_2$ , presumably as a 1:2 complex, was guaranteed. The  $\phi_f$  was then determined using the procedure described above.

## Additional Spectra:

### CYCLIC VOLTAMMOGRAMS

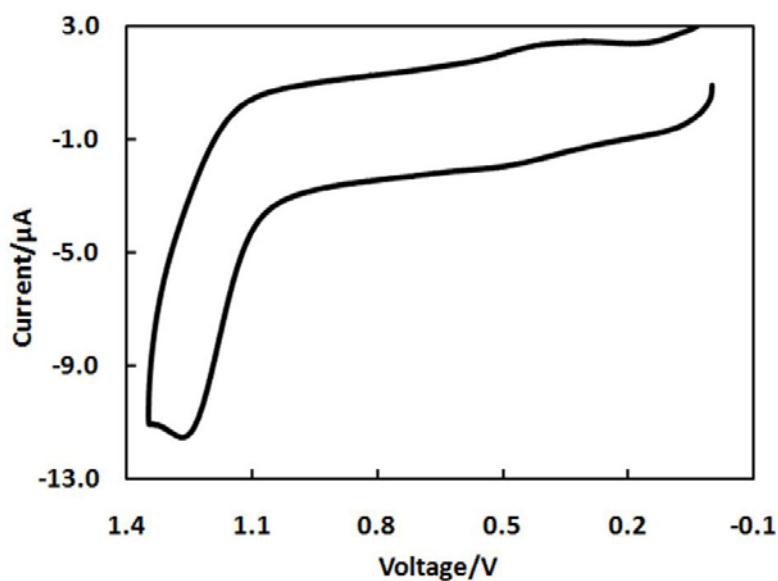

**Figure S1.** Cyclic voltammogram of **2a** ( $\sim 0.5$  mM in  $\text{CH}_3\text{CN}$ ).  $[\text{Bu}_4\text{NPF}_6] = 0.1$  M. Reference electrode Ag/AgCl;  $E_{1/2}(\text{Fc}/\text{Fc}^+) = 0.62$  V.

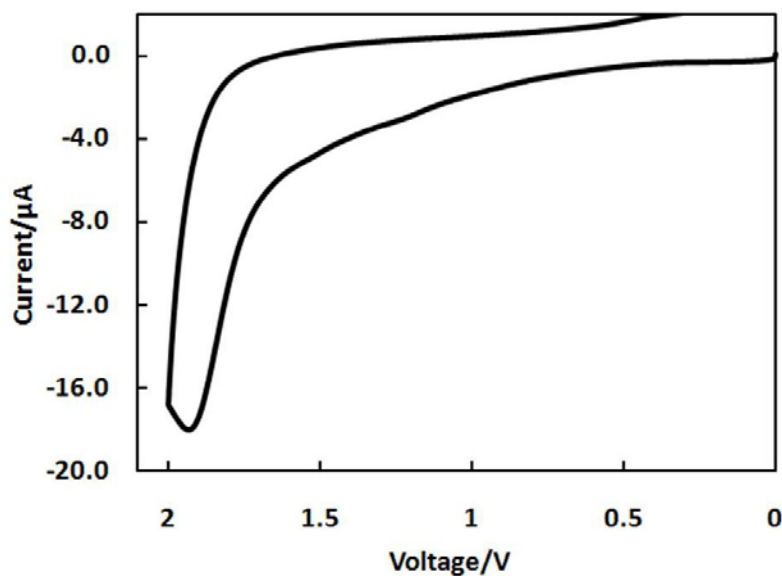

**Figure S2.** Cyclic voltammogram of **3** ( $\sim 0.5$  mM in  $\text{CH}_3\text{CN}$ ).  $[\text{Bu}_4\text{NPF}_6] = 0.1$  M. Reference electrode Ag/AgCl;  $E_{1/2}(\text{Fc}/\text{Fc}^+) = 0.62$  V.

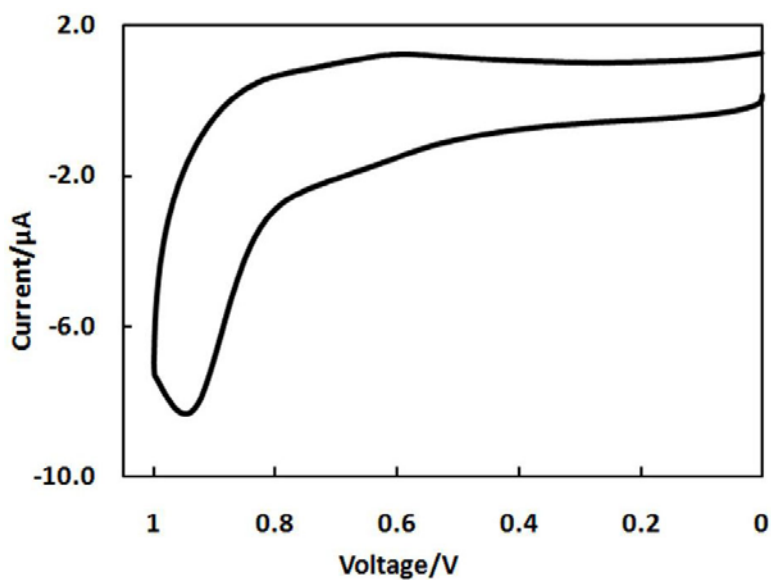

**Figure S3.** Cyclic voltammogram of **2b** ( $\sim 0.5$  mM in  $\text{CH}_3\text{CN}$ ).  $[\text{Bu}_4\text{NPF}_6] = 0.1$  M. Reference electrode Ag/AgCl;  $E_{1/2}(\text{Fc}/\text{Fc}^+) = 0.62$  V.

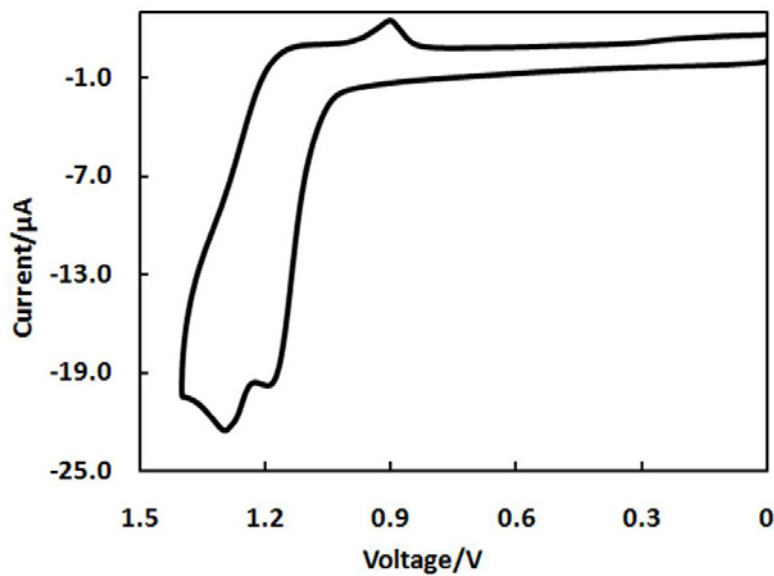

**Figure S4.** Cyclic voltammogram of **4** ( $\sim 0.5$  mM in  $\text{CH}_3\text{CN}$ ).  $[\text{Bu}_4\text{NPF}_6] = 0.1$  M. Reference electrode Ag/AgCl;  $E_{1/2}(\text{Fc}/\text{Fc}^+) = 0.62$  V.

**ADDITIONAL MOLECULAR ORBITAL DIAGRAMS**

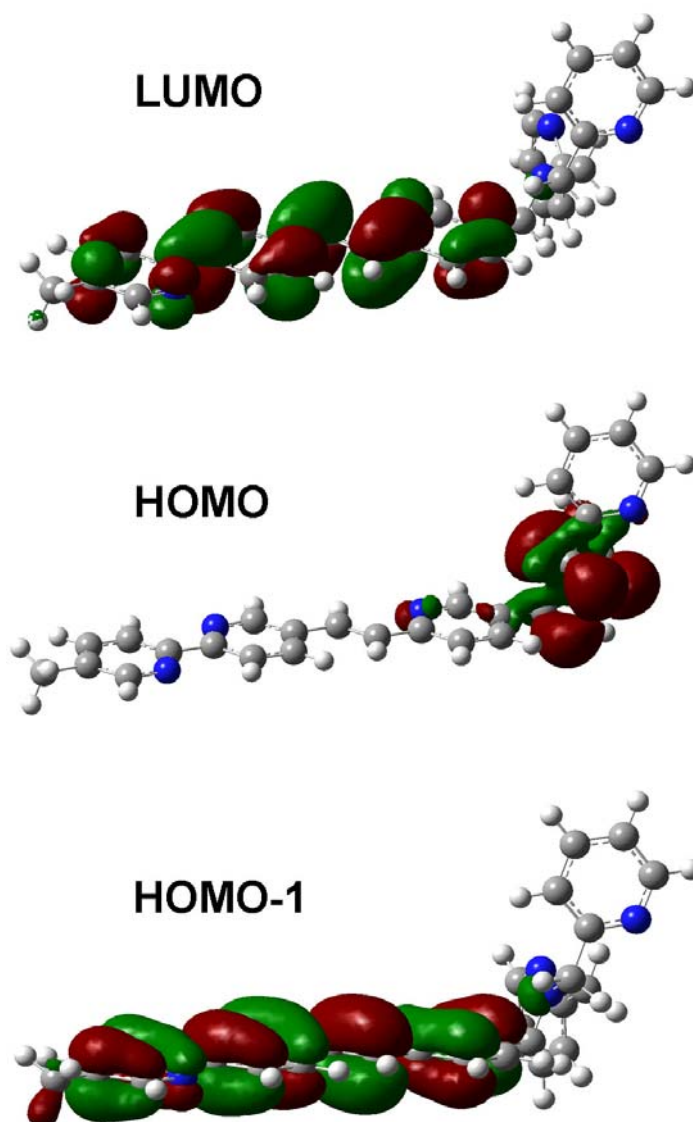

**Figure S5.** Frontier molecular orbital diagrams of **2a** (B3LYP/6-31+G (d,p) level).

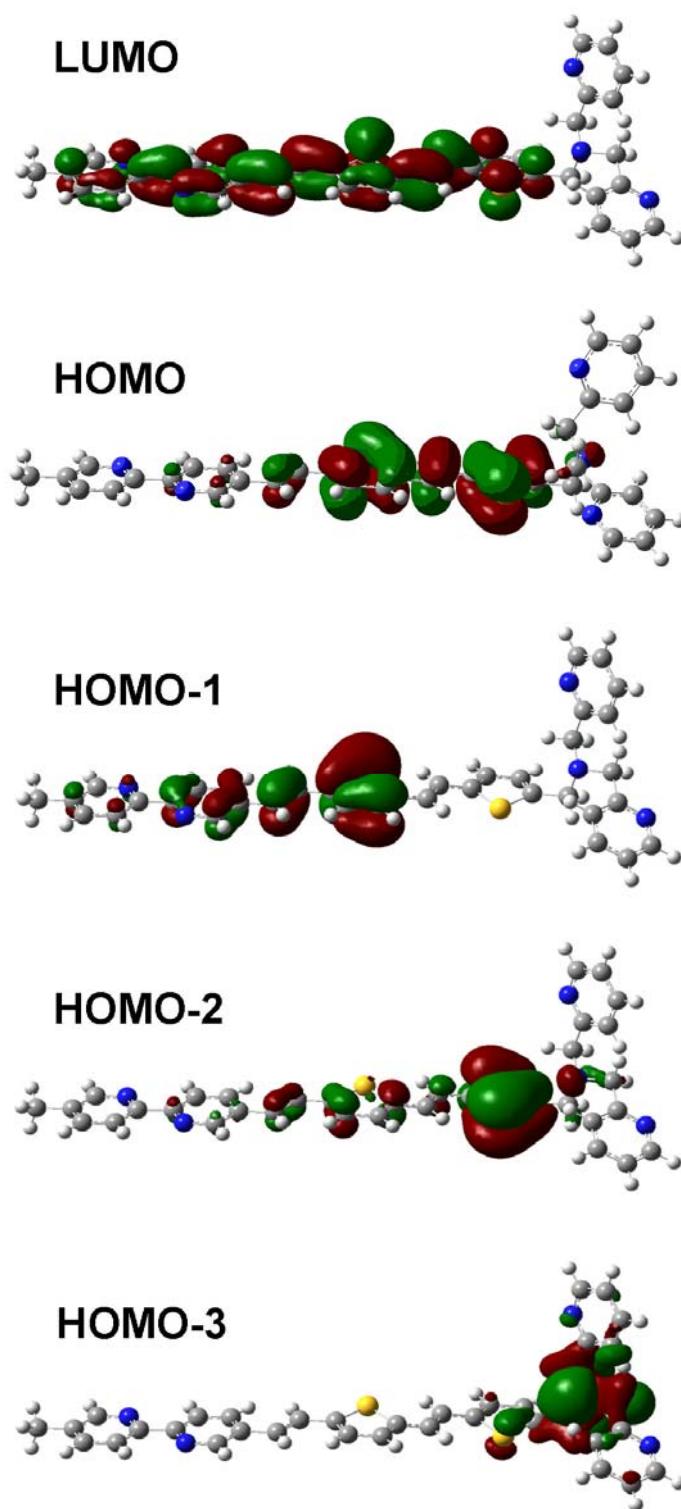

**Figure S6.** Frontier molecular orbital diagrams of **2b** (B3LYP/6-31+G (d,p) level).

# ADDITIONAL ABSORPTION AND FLUORESCENCE SPECTRA

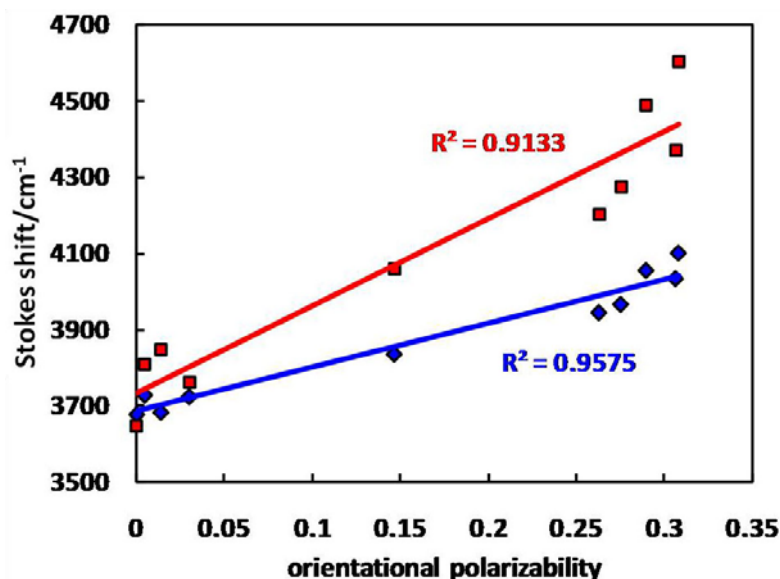

**Figure S7.** Lippert plots of compounds **3** (blue) and **4** (red). Orientational polarizability  $\Delta f = (\epsilon - 1)/(2\epsilon + 1) - (n^2 - 1)/(2n^2 + 1)$ .  $\epsilon$ : relative permittivity;  $n$ : refractive index.

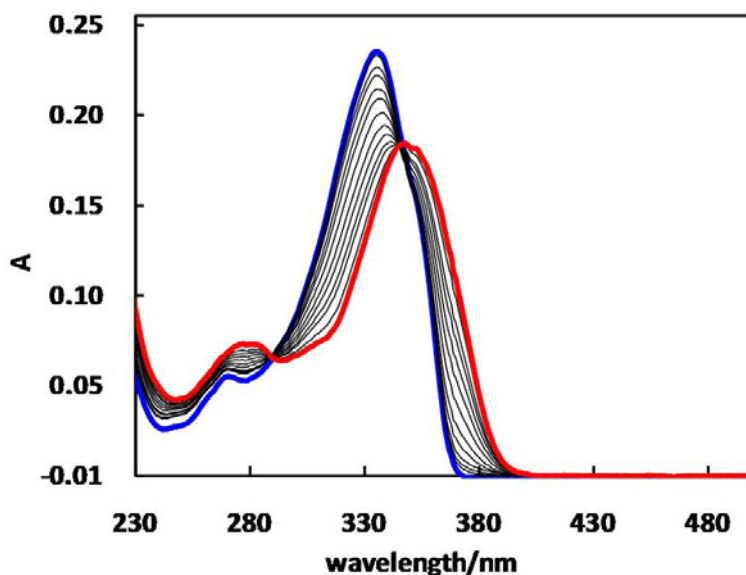

**Figure S8.** Absorption spectra of **3** (5.0 μM) in CH<sub>3</sub>CN upon addition of ZnCl<sub>2</sub> (0 – 26.9 μM). The spectra that were collected at the beginning and the end of a titration experiment are coded blue and red, respectively.

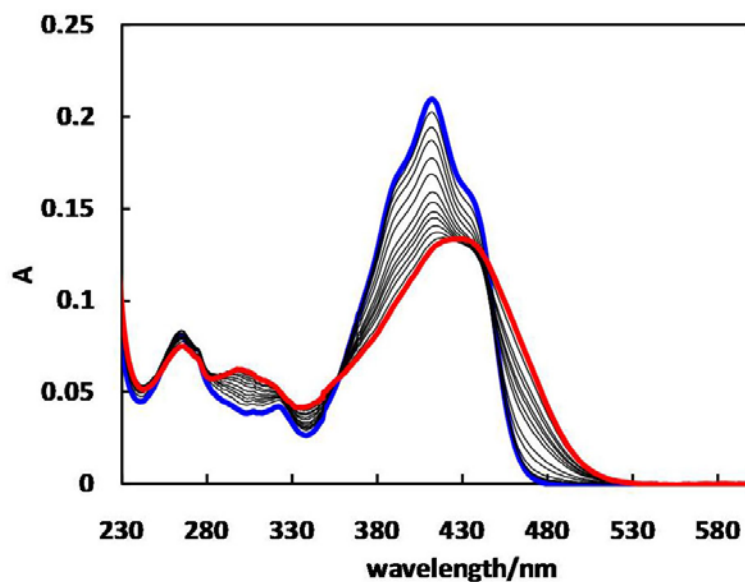

**Figure S9.** Absorption spectra of **4** (3.85  $\mu\text{M}$ ) in  $\text{CH}_3\text{CN}$  upon addition of  $\text{ZnCl}_2$  (0–25.6  $\mu\text{M}$ ). The spectra that were collected at the beginning and the end of a titration experiment are coded blue and red, respectively.

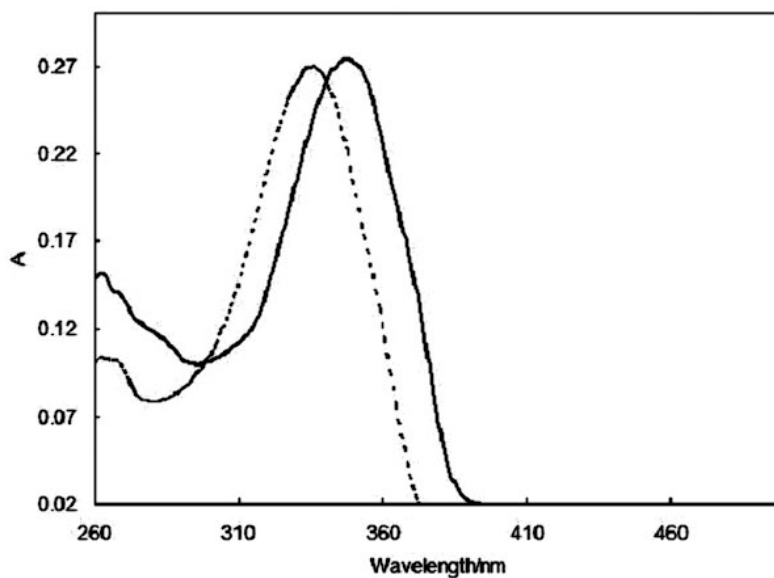

**Figure S10.** Normalized absorption Spectra of **2a** (dotted) measured in aqueous buffer solution (HEPES: 50 mM, pH =7.4, EGTA: 2.5 mM, HEDTA: 2.5 mM, NTA: 5 mM,  $\text{KNO}_3$ : 100 mM) with the corresponding zinc coordinated **2a** (dashed).

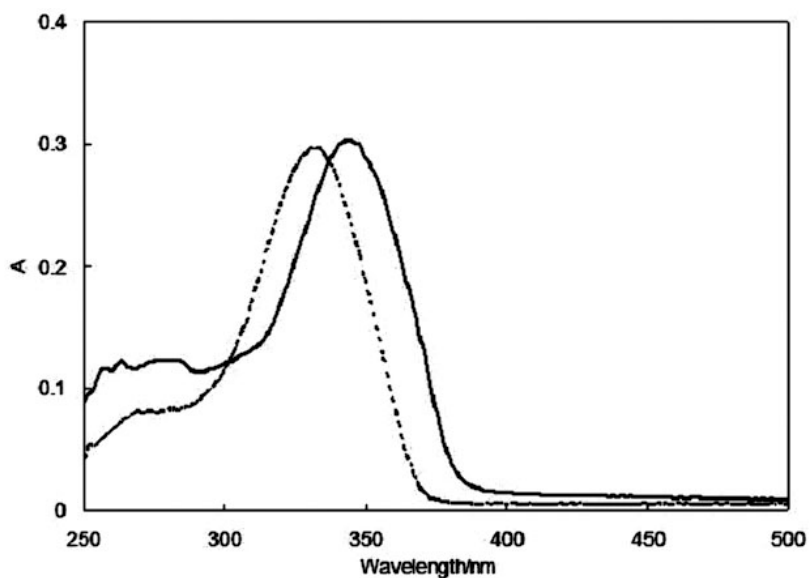

**Figure S11.** Normalized absorption spectra of **4** (dotted) and its zinc complex (dashed) measured in aqueous buffer solution (HEPES: 50 mM, pH =7.4, EGTA: 2.5 mM, HEDTA: 2.5 mM, NTA: 5 mM, KNO<sub>3</sub>: 100 mM).

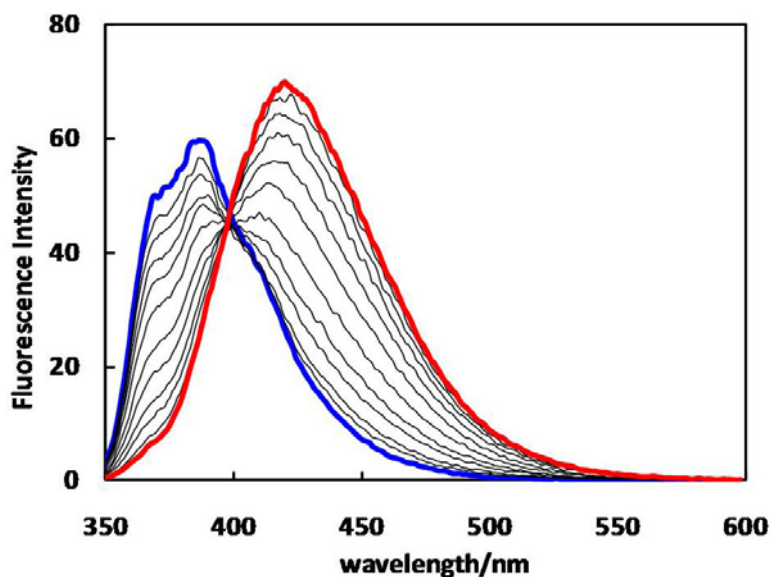

**Figure S12.** Emission spectra ( $\lambda_{\text{ex}} = 336 \text{ nm}$ ) of **3** (5.0  $\mu\text{M}$ ) in CH<sub>3</sub>CN upon addition of ZnCl<sub>2</sub> (0 – 23.4  $\mu\text{M}$ ). The spectra that were collected at the beginning and the end of a titration experiment are coded blue and red, respectively.

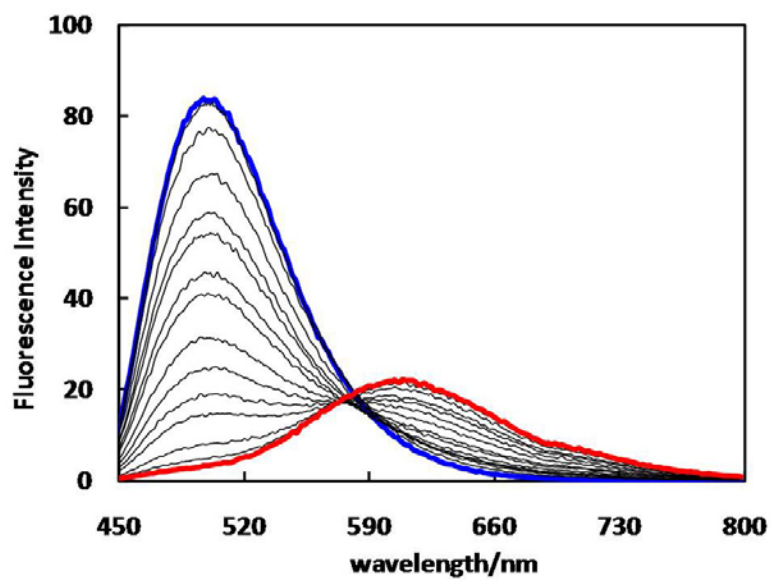

**Figure S13.** Emission spectra ( $\lambda_{\text{ex}} = 430 \text{ nm}$ ) of **4** ( $3.85 \mu\text{M}$ ) in  $\text{CH}_3\text{CN}$  upon addition of  $\text{ZnCl}_2$  ( $0 - 40.0 \mu\text{M}$ ). The spectra that were collected at the beginning and the end of a titration experiment are coded blue and red, respectively.

### REPRESENTATIVE FLUORESCENCE DECAY TRACES

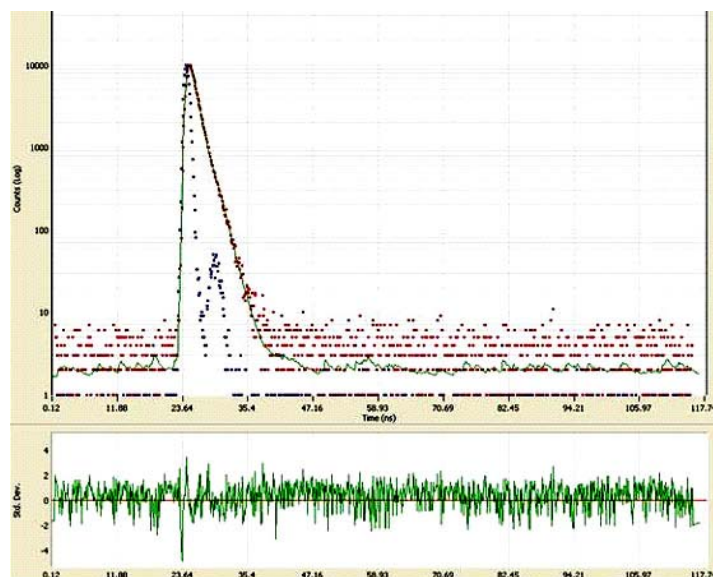

**Figure S14.** The fluorescence decay trace of zinc complex of **2a** in  $\text{CH}_3\text{CN}$ .  $\tau_1 = 1.08$  ns,  $\tau_2 = 1.98$  ns ( $\chi^2 = 1.20$ ).

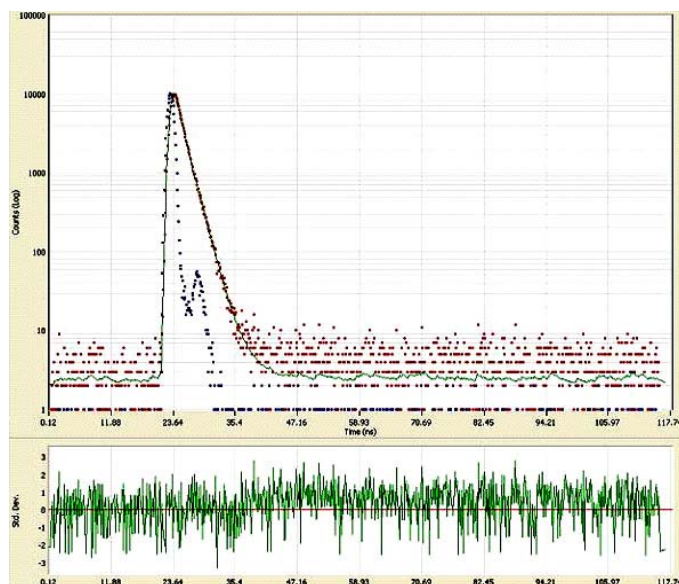

**Figure S15.** The fluorescence decay trace of zinc complex of **2b** in  $\text{CH}_3\text{CN}$ .  $\tau_1 = 1.39$  ns,  $\tau_2 = 2.67$  ns ( $\chi^2 = 1.29$ ).

**AUTOFLUORESCENCE OF HeLa CELLS**

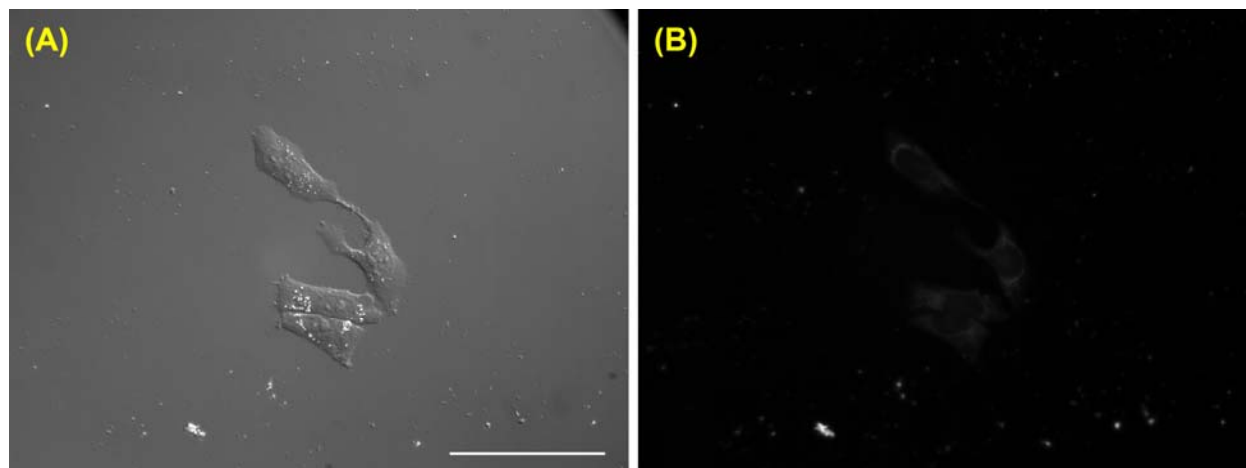

**Figure S16.** (A) Differential interference contrast (DIC) and (B) fluorescence images (Omega Q-Max Blue filter set; excitation 355 – 405 nm; emission 420 – 480 nm) of live HeLa cells in HBSS buffer at 37 °C under 5% CO<sub>2</sub>. Scale bar: 50 μm.
